# Supplementary material for: AKT in Bone Metastasis of Solid Tumors: A Comprehensive Review
Source: MDPI journal article supplement (doi:10.3390/cancers13102287), 2021-05-11
Supplement: s1 [file s1]

# Supplementary Materials: AKT in Bone Metastasis of Solid Tumors: A Comprehensive Review

Nico Hinz and Manfred Jücker

**Table S1.** Publications with mouse experiments evaluating the role of AKT in bone metastasis of breast, prostate and lung cancer.

| Type of solid tumor | Publication                | Mouse model                                                                                                                                                                                                                | Main findings                                                                                                                                                                                |
|---------------------|----------------------------|----------------------------------------------------------------------------------------------------------------------------------------------------------------------------------------------------------------------------|----------------------------------------------------------------------------------------------------------------------------------------------------------------------------------------------|
| breast cancer       | Buschhaus et al. 2020 [48] | NSG mice; MCF7 cells; femoral artery injection; bioluminescence imaging (BLI), FLIM or pHAEP microscopy                                                                                                                    | Combination of the AKT inhibitor MK2206 and the thioredoxin reductase inhibitor D9 reduces intraosseous tumor growth                                                                         |
|                     | Liu et al. 2018 [49]       | BALB/c mice; 4T1.2 cells; iliac artery injection; micro-CT analysis, mechanical testing and histological analysis                                                                                                          | Fluphenazine and trifluoperazine inhibits intraosseous tumor growth via reduced pAKT levels                                                                                                  |
|                     | Khotskaya et al. 2014 [50] | Athymic nude mice; MDA-MB-231 cells; tail vein injection; BLI imaging and X-ray analysis                                                                                                                                   | The AKT/mTOR/S6K1 axis is hyperactivated in breast cancer cells harvested from bone metastases                                                                                               |
|                     | Wang et al. 2015 [54]      | BALB/c mice; MCF7, MDA-MB-361, 4TO7 cells; Iliac artery injection; BLI and immunofluorescence analysis                                                                                                                     | E-N-heterotypic adherens junctions promote bone colonization via an activation of the AKT/mTOR pathway                                                                                       |
|                     | Sun et al. 2019 [56]       | BALB/C mice; 4T1 cells; intratibial injection and mammary fat pad injection; IHC staining                                                                                                                                  | CENPF and PTHrP expression are higher in bone metastases compared to mammary fat pad tumors (CENPF promotes PTHrP expression via PI3K/AKT/mTORC1 activation)                                 |
|                     | Zeng et al. 2014 [59]      | C57BL/6 nude mice; MDA-MB-231BA-rfp cells; tail vein injection; micro-PET analysis                                                                                                                                         | Knockdown of CXCR4 inhibits bone metastasis via a suppression of the PI3K/AKT/MMP9 axis                                                                                                      |
|                     | Zhang et al. 2009 [63]     | Athymic or Bg-Xu mice; MDA-MB-231, BoM-1833, CN34 BoM2 cells; intracardiac, intratibial or mammary fat pad injection; BLI, X-ray and histological analysis<br>Microarray gene expression of human breast cancer metastasis | Knockdown of c-Src reduces bone metastasis partly via a diminished CXCL12-dependent AKT activation                                                                                           |
|                     | Zhang et al. 2013 [64]     | Bg-nu mice; various MDA-MB-231 and CN34 sublines; intracardiac injection or mammary fat pad injection; BLI; X-ray and histological analysis                                                                                | Bone-metastatic cells show a high Src-dependent sensitivity for CXCL12- and IGF-1-mediated AKT activation and are selected by cancer-associated fibroblasts                                  |
|                     | Fritsche et al. 2015 [65]  | SCID mice; MDA-MB-231-BO cells; intracardiac injection; BLI, MRI, micro-Ct and histological analysis                                                                                                                       | Knockdown of TRAIL-R2 reduces bone metastasis via decreased levels of pAKT and CXCR4                                                                                                         |
|                     | Futakuchi et al. 2019 [66] | BALB/c mice; Cl66M2 cells; subcutaneous injection and injection over the calvaria; IHC, tumor volume and histological analysis                                                                                             | TGF $\beta$ promotes the growth of bone metastases and the induction of cancer stem cells in the bone microenvironment partly via an AKT activation                                          |
|                     | Xie et al. 2017 [68]       | Nude or C57BL/6J mice; MDA-MB-231 cells; intracardiac injection; BLI                                                                                                                                                       | Tyrosine receptor kinase-mediated AKT activation reduces the FAF1-mediated destabilization of T $\beta$ RII and therefore increases bone metastasis through an accumulation of T $\beta$ RII |
|                     | Hiraga et al. 2012 [70]    | Athymic nude and SCID mice; MDA-MB-231 cells; intracardiac injection; X-ray and histological analysis                                                                                                                      | IGF-1 promotes bone metastasis via an IGF-1R/AKT/NF $\kappa$ B axis independently of other bone-derived growth factors                                                                       |

|                 |                                        |                                                                                                                                   |                                                                                                                                                                     |
|-----------------|----------------------------------------|-----------------------------------------------------------------------------------------------------------------------------------|---------------------------------------------------------------------------------------------------------------------------------------------------------------------|
|                 | Hu et al. 2020 [71]                    | Nude mice; intracardiac inoculation; MDA-MB-231BO cells; BLI and histological analysis                                            | Inhibition of IGF-1R reduces bone metastasis via diminished pAKT levels                                                                                             |
|                 | Logan et al. 2013 [72]                 | BALB/c mice; intratibial injection; 4T1 cells; micro-CT and histological analysis                                                 | The IGF-1R inhibitor reduces tumor-induced osteolysis via inhibition of the IGF-1/IGF-1R/AKT axis-dependent osteoclast formation                                    |
|                 | Tandon et al. 2016 [73]                | NSG mice; MDA-MB-231 cells; intracardiac inoculation; BLI, micro-CT and X-ray analysis, harvesting of bone-seeking sub-population | Knockdown of RUNX2 inhibits the early phase of bone metastasis but promotes the late outgrowth of bone metastases via an activation of the IGF-1R $\beta$ /AKT axis |
|                 | Denoyer et al. 2014 [75]               | BALB/c mice; 4T1BM2 cells; intracardiac injection; histological analysis and qPCR                                                 | Inhibition of AKT1 and AKT2 reduces bone metastasis                                                                                                                 |
|                 | Nasrazadani and Van Den Berg 2011 [76] | BALB/c mice; 4T1.2 cells; intracardiac injection; IHC                                                                             | Knockdown of JNK2 diminished bone metastasis via a reduced AKT phosphorylation after stimulation with HGF, insulin or heregulin                                     |
|                 | Ren et al. 2014 [78]                   | Nude mice; SK-BR-3 cells; subcutaneous injection; IHC and histological analysis                                                   | BMP9 suppresses tumor growth via an inhibited PI3K/AKT signaling                                                                                                    |
|                 | Wan et al. 2014 [79]                   | Injection into human fetal femur fragments implanted into nude mice; MDA-MB-231 cells; IHC                                        | BMP9 reduces the formation of osteolytic lesions via a decreased RANKL-mediated AKT phosphorylation                                                                 |
|                 | Lee et al. 2012 [82]                   | Nude mice; MDA-MB-231 cells; intracardiac injection; X-ray and histological analysis                                              | Knockdown of CXCR3 reduces bone metastasis via a lack of CXCL10-mediated AKT activation                                                                             |
|                 | Humphries et al. 2020 [84]             | NSG mice; MDA-MB-231 and SUM159 cells; intracardiac injection or femoral artery injection; BLI and micro-CT analysis              | Mitochondrial fission decreases the formation of osteolytic bone metastases via a reduced AKT activation                                                            |
|                 | Shrivastava et al. 2019 [87]           | BALB/c mice; 4T1 cells; mammary fat pad injection; X-ray, micro-CT and histological analysis                                      | Oncostatin M promotes metastasis to bone, lung and liver via an mTORC2/AKT-mediated M2 polarization of macrophages                                                  |
|                 | Yuan et al. 2019 [88]                  | BALB/c mice; MDA-MB-231 cells; intratibial injection; micro-CT, histological, IHC and PCR analysis                                | The PI3K/mTOR-inhibitor PKI-402 inhibits the formation of osteolytic metastases via a suppression of the PI3K/AKT/mTOR axis                                         |
|                 | Wang et al. 2018 [89]                  | BALB/c mice; MDA-MB-231 cells; intratibial injection; micro-CT and histological analysis                                          | Raddeanin A inhibits the formation of osteolytic lesions via a reduction of pAKT levels                                                                             |
|                 | Feng et al. 2016 [90]                  | BALB/c mice; MDA-MB-231 cells; intratibial injection; micro-CT, histological and IHC analysis                                     | Dihydroartemisinin reduces the formation of osteolytic metastases via an inhibition of AKT                                                                          |
|                 | Jiang et al. 2020 [91]                 | BALB/c mice; MDA-MB-231 cells; intratibial injection; micro-CT and histological analysis                                          | Asperolide A attenuates breast cancer-induced osteolysis via an inhibition of the PI3K/AKT/mTOR/c-FOS/NFATc1 axis in osteoclasts                                    |
|                 | Urakawa et al. 2012 [93]               | BALB/c mice; MDA-MB-231 cells; intratibial injection; X-ray and histological analysis                                             | 4-methylumbelliferone attenuates the formation of osteolytic lesions via a suppressed AKT phosphorylation                                                           |
|                 | Tang et al. 2010 [97]                  | Nude mice; MCF-7 cells; subcutaneous injection; hemoglobin amount analysis                                                        | Clodornate inhibits angiogenesis via a suppression of the IGF-1/AKT/HIF-1 $\alpha$ /VEGF axis                                                                       |
| prostate cancer | Shi et al. 2018 [102]                  | BALB/c, SCID or C57BL/6J mice; PC-3, C4-2B or RM-1 cells; subcutaneous injection; BLI and subsequent array analysis               | AKT promotes EMT and therefore colonization of prostate cancer cells to the bone marrow in the initiation stage                                                     |
|                 | Conley-LaComb et al. 2013 [106]        | SCID mice; DU145 cells; intratibial injection; histological analysis                                                              | Overexpression of AKT1 leads to higher intraosseous tumor growth via an upregulation of CXCR4                                                                       |

|                            |                                                                                                                       |                                                                                                                                                                                        |
|----------------------------|-----------------------------------------------------------------------------------------------------------------------|----------------------------------------------------------------------------------------------------------------------------------------------------------------------------------------|
| Chinni et al. 2006 [107]   | Injection into human fetal femur fragments implanted into SCID mice; PC-3 cells; IHC analysis                         | CXCL12 causes a phosphorylation of AKT1                                                                                                                                                |
| Chen et al. 2011 [108]     | BALB/c mice; PC-3 cells; tail vein injection; histopathological and X-ray analysis                                    | OLFM4 expression leads to a reduced bone metastasis via an inhibition of CXCL12-mediated AKT phosphorylation                                                                           |
| Chen et al. 2013 [112]     | CB17-SCID mice; PC-3 cells; intratibial injection; X-ray analysis and histological analysis                           | Cells with a high CCN3 expression exhibit an increased bone metastasis and osteoclast formation via a RANKL-mediated activation of the FAK/AKT/ p38/NF- $\kappa$ B axis in osteoclasts |
| Chen et al. 2012 [113]     | CB17-SCID mice; PC-3 cells; intratibial injection; X-ray analysis                                                     | Knockdown of CCN3 decreases the formation of osteolytic lesions via an absent CCN3-mediated AKT activation                                                                             |
| Xu et al. 2018 [116]       | BALB/c mice; DU145 cells; subcutaneous injection; ELISA analysis of serum and IHC analysis                            | Inhibition of AKT reduces expression of BSP, OPN, MMP2 and $\alpha$ v $\beta$ 3-integrin                                                                                               |
| Colden et al. 2017 [119]   | Athymic nude mice; PC-3 cells; orthotopic or intracardiac injection; BLI                                              | miR-466 suppresses bone metastasis via a downregulation of RUNX2 and RUNX2-mediated AKT expression                                                                                     |
| Josson et al. 2014 [120]   | Nude mice; ARCaP <sub>M</sub> cells; orthotopic injection, BLI and IHC analysis                                       | miR-409-3p/-5p expression upregulates pAKT levels and inhibition of miR-409-3p/-5p leads to a decreased bone metastasis                                                                |
| Jin et al. 2015 [123]      | Nude mice; PC3-MM2 cells; intracardiac injection; BLI and X-ray analysis                                              | Inhibition of S435 phosphorylation of Talin reduced bone metastasis accompanied by lower pAKT levels                                                                                   |
| Mainetti et al. 2015 [124] | Injection into human fetal femur fragments implanted into SCID mice; PC-3, and C4-2B cells; histological analysis     | Expression of c-kit increases bone metastasis partly via the PI3K/AKT pathway                                                                                                          |
| Seol et al. 2019 [129]     | Athymic nude mice; PC-3 cells; intracardiac injection; PCR analysis of hindlimb DNA                                   | Overexpression of the IL-7R increases bone metastasis partly via an activation of the AKT signaling                                                                                    |
| Liao et al. 2006 [130]     | Athymic nude mice; PC-3 cells; intracardiac inoculation; BLI                                                          | Knockdown of CaSR reduces bone metastasis via a reduced calcium-dependent AKT activation                                                                                               |
| Tang et al. 2018 [131]     | BALB/c mice; PC-3 cells; intracardiac injection; BLI and X-ray analysis                                               | miR-133a-3p reduces the formation of osteolytic lesions via a suppression of EGFR- and IGF-1R-mediated AKT activation                                                                  |
| Pradhan et al. 2018 [134]  | Athymic nude mice; PC3-ML cells; intracardiac injection; BLI                                                          | Overexpression of AKT increases bone metastasis and treatment with MDA-7/IL-24 abrogates the increased bone metastasis                                                                 |
| Liu et al. 2019 [136]      | BALB/c mice; DU145 cells; intratibial injection; micro-CT and histological analysis                                   | The PI3K inhibitor ZSTK474 suppresses bone metastasis and osteolysis via an inhibition of the AKT-mediated MMP9 expression                                                             |
| Mancini et al. 2018 [100]  | CD1 nude mice; PC-3 or 22v1 cells; intracardiac or intratibial injection; X-ray analysis                              | The dual PI3K/mTOR inhibitor X480 inhibits bone metastasis and tumor-induced osteolysis                                                                                                |
| Watanabe et al. 2016 [137] | BALB/c mice; PC-3 cells; intratibial injection, micro-CT, DEXA and histological analysis                              | The tyrosine kinase inhibitor TAS-115 reduced cancer-induced osteolysis via an inhibition of the M-CSF/FMS-dependent AKT activation in osteoclasts                                     |
| Huang et al. 2015 [138]    | SCID mice; PC-3 cells; intratibial injection; X-ray and histological analysis                                         | Pristimerin inhibits the formation of osteolytic bone metastases via a reduction of VEGFR-mediated AKT signaling in bone marrow endothelial progenitor cells                           |
| Hsu et al. 2015 [139]      | SCID mice; PC-3 cells; intratibial injection; micro-CT and X-ray analysis                                             | Inhibition of IL-20 mediated AKT activation reduces cancer-induced osteolysis                                                                                                          |
| Yano et al. 2008 [141]     | Nude mice; PC-3M cells; intratibial injection; BLI                                                                    | The Hsp90 inhibitor 17AAG increases the intraosseous tumor growth via a Src-dependent AKT activation in osteoclasts                                                                    |
| Dayyani et al. 2012 [143]  | Nude mice; PC3-MM2 cells; intratibial injection; micro-CT and X-ray analysis and analysis of bone turnover parameters | Combined inhibition of IGF-1R and Src family kinases inhibits the formation of osteolytic lesions and bone turnover via a suppression of AKT1 and AKT2 activity                        |

|             |                            |                                                                                                                          |                                                                                                                                                           |
|-------------|----------------------------|--------------------------------------------------------------------------------------------------------------------------|-----------------------------------------------------------------------------------------------------------------------------------------------------------|
|             | Rabbani et al. 2010 [144]  | SCID mice; PC-3 cells; intratibial inoculation; micro-CT and X-ray analysis                                              | The Src/Abl kinase inhibitor bosutinib inhibits the formation of osteolytic lesions via reduced pAKT levels and reduced expression of MMP9, uPAR and IL-8 |
|             | Rabbani et al. 2010 [145]  | SCID mice; PC-3 cells; intratibial inoculation; X-ray and histological analysis                                          | The uPAR inhibitor ATN-658 reduces the intraosseous tumor growth partly via an inhibition of AKT phosphorylation                                          |
|             | Yates et al. 2015 [146]    | Athymic mice; PC3-ML; intracardiac injection; BLI                                                                        | 4-methylumbelliferone inhibits bone metastasis partly via a suppression of the AKT pathway                                                                |
|             | Hsieh et al. 2020 [147]    | BALB/c mice; PC-3 cells; intratibial injection; BLI and histological analysis                                            | LCC03 inhibits the intraosseous tumor growth via an enhanced autophagy through a reduced AKT signaling                                                    |
|             | Banerjee et al. 2007 [148] | Injection into human fetal femur fragments implanted into SCID mice; C4-2B cells; tumor volume and histological analysis | Combination of docetaxel and the ETA inhibitor ABT-627 reduces intraosseous tumor growth via a suppression of the AKT/NFkB axis                           |
| lung cancer | Nakamura et al. 2006 [153] | SCID mice; SBC-5 cells; tail vein injection; histological analysis                                                       | CCR4 expressing tumor cells colocalizes with CCL22 producing osteoclasts (CCL22 activates the AKT signaling via CCR4)                                     |
|             | Chang et al. 2017 [159]    | SCID mice; A549 cells; orthotopic injection; BLI                                                                         | Querceptin reduces bone metastasis via a downregulation of Snail followed by a maspin-mediated inhibition of AKT activity                                 |

**Table S2.** Clinical experiments evaluating the role of AKT in bone metastasis of breast, prostate and lung cancer. Information in brackets represent data of in vitro or in vivo experiments of the respective publication.

| Type of solid tumor | Publication                | Study design                                                                                                                                                          | Main findings                                                                                                                                                                                                                                                                                                                                                                                                                                          |
|---------------------|----------------------------|-----------------------------------------------------------------------------------------------------------------------------------------------------------------------|--------------------------------------------------------------------------------------------------------------------------------------------------------------------------------------------------------------------------------------------------------------------------------------------------------------------------------------------------------------------------------------------------------------------------------------------------------|
| breast cancer       | Chen et al. 2018 [51]      | Microarray gene expression analysis of disseminated tumor cells and bone metastatic tumor cells                                                                       | The PI3K/AKT pathway is associated with the formation of bone metastases                                                                                                                                                                                                                                                                                                                                                                               |
|                     | Kono et al. 2018 [52]      | Next generation sequencing of patients with bone metastases, non-bone metastases or bone and non-bone metastases                                                      | The frequency of somatic mutations of AKT and PIK3CA show no differences between bone metastases and non-bone metastases                                                                                                                                                                                                                                                                                                                               |
|                     | Li et al. 2020 [53]        | Microarray analysis of primary tumor and different sites of metastasis                                                                                                | AKT signaling is downregulated in bone metastases and upregulated in skin metastases                                                                                                                                                                                                                                                                                                                                                                   |
|                     | Wang et al. 2015 [54]      | Expression analysis of various metastatic sites and The Cancer Genome Atlas analysis for signature scores in disseminated tumor cells and bone metastases             | N cadherin levels are higher in bone metastases compared to other metastatic sites and high E cadherin levels are associated with a shorter bone metastasis-free survival (E-N-heterotypic adherens junctions promote bone metastasis via the activation of the AKT/mTOR signaling) mTOR activity is higher in bone metastases compared to disseminated tumor cells                                                                                    |
|                     | Werner et al. 2015 [55]    | Gene expression profiling primary tumor and disseminated tumor cells in the bone marrow                                                                               | Downregulation of RAI2 is more frequent in disseminated tumor cells in the bone marrow compared to primary tumor probes (Knockdown of RAI2 increases pAKT levels)                                                                                                                                                                                                                                                                                      |
|                     | Sun et al. 2019 [56]       | Database analysis of primary tumor and bone metastases                                                                                                                | Bone metastases show higher CENPF expression compared to primary tumor or lung metastases (CENPF promotes PTHrP expression via PI3K/AKT/mTORC1 activation)                                                                                                                                                                                                                                                                                             |
|                     | Kim et al. 2006 [58]       | IHC staining of primary breast tumors with simultaneous or non-simultaneous bone metastases                                                                           | pAKT levels are elevated in 81.8% of HER2-positive breast cancer with bone metastases (The HER2/CXCR4/AKT axis is suggested to be important in bone metastases)                                                                                                                                                                                                                                                                                        |
|                     | Cabioglu et al. 2005 [61]  | Expression analysis of breast tumor patients                                                                                                                          | A subpopulation of patients with breast cancer exhibits a co-expression of CXCR4 and HER2 (The CXCL12/CXCR4 partly activates the AKT signaling)                                                                                                                                                                                                                                                                                                        |
|                     | Zhang et al. 2009 [63]     | Gene expression analysis of a dataset of breast tumors with known bone metastasis outcomes.<br>Microarray gene expression analysis of bone, brain and lung metastases | A Src response signature is associated with a bone relapse and the formation of bone metastases in patients. Expression of CXCL12, IGF1, BMP2, TGF $\beta$ , PDGF, VEGF and TRAIL is higher in bone metastases compared to other distant metastatic sites (Knockdown of c-Src reduces bone metastasis partly via a diminished CXCL12-dependent AKT activation)                                                                                         |
|                     | Zhang et al. 2013 [64]     | Gene expression analysis of various datasets of breast tumors and The Cancer Genome Atlas analysis                                                                    | CXCL12 and IGF1 are associated with a lower bone metastasis-free survival and with a Src response signature. CXCL12 and IGF1 originates from cancer associated fibroblasts (CAF) and a CAF signature is overrepresented in bone metastases compared to other metastatic sites as well as is associated with a lower bone metastasis-free survival (Knockdown of c-Src reduces bone metastasis partly via a diminished CXCL12-dependent AKT activation) |
|                     | Huang et al. 2017 [80]     | IHC analysis of breast tumor samples                                                                                                                                  | Expression of BMP2 is positively correlated with the expression of CD44 and is negatively correlated with the expression of Rb (BMP2 promotes the degradation of Rb via the AKT pathway and therefore causes an upregulation of EMT-promoting CD44)                                                                                                                                                                                                    |
|                     | Yamaguchi et al. 2016 [83] | Expression analysis of breast cancer patients                                                                                                                         | A low regucalcin expression is associated with a poor prognosis (Regucalcin overexpression reduced AKT signaling and suppressed osteoclastogenesis)                                                                                                                                                                                                                                                                                                    |

|                 |                             |                                                                                                                                              |                                                                                                                                                                                                                                                      |
|-----------------|-----------------------------|----------------------------------------------------------------------------------------------------------------------------------------------|------------------------------------------------------------------------------------------------------------------------------------------------------------------------------------------------------------------------------------------------------|
| prostate cancer | Humphries et al. 2020 [84]  | Gene expression analysis of CTCs derived from metastatic breast cancer patients and The Cancer Genome Atlas analysis                         | High expression of genes, which are known to drive mitochondrial fission, correlate with a longer metastasis-free survival (Mitochondrial fission decreases the formation of osteolytic bone metastases via a reduced AKT activation)                |
|                 | Feng et al. 2016 [90]       | The Cancer Genome Atlas analysis and gene set enrichment analysis                                                                            | A high expression of FAF1 is associated with a better metastasis-free survival and a lower tumor invasiveness. A consensus signature of genes correlated with bone metastasis is enriched in FAF1-low patients                                       |
|                 | Mancini et al. 2018 [100]   | IHC staining of pAKT in bone metastases vs. primary tumor                                                                                    | Higher activation of AKT in bone metastases compared to the primary tumor                                                                                                                                                                            |
|                 | Mimeault et al. 2012 [103]  | IHC and immunofluorescence staining in normal prostate tissue, primary tumor and bone metastases                                             | Higher pAKT levels in bone metastases compared to normal prostate tissue and primary tumor                                                                                                                                                           |
|                 | Ihle et al. 2019 [104]      | Immunofluorescence staining of lytic vs. blastic lesions of prostate cancer                                                                  | Osteolytic lesions exhibit higher pAKT levels and osteoblastic lesions show higher pSTAT3 levels                                                                                                                                                     |
|                 | Chen et al. 2013 [112]      | IHC staining in normal tissue, early-stage prostate cancer, late-stage prostate cancer and bone metastases                                   | CCN3 levels are higher in bone metastases compared to normal tissue, early stage and late stage prostate cancer (CCN3 increases osteoclastogenesis via the RANKL-dependent AKT activation)                                                           |
|                 | Zhang et al. 2011 [117]     | IHC staining in primary tumor, lymph node metastases and bone metastases                                                                     | Specimen of lymph node metastases and bone metastases exhibit lower PTEN levels (therefore a higher AKT activation) and higher RUNX2 levels compared to the primary tumors                                                                           |
|                 | Yamaguchi et al. 2021 [122] | Microarray data of primary tumor and metastases                                                                                              | Lower regucalcin expression in the metastases compared to the primary tumor. (Overexpression of regucalcin reduces AKT-mediated bone cell stimulation)                                                                                               |
|                 | Jin et al. 2015 [123]       | IHC staining of primary tumor, lymph node metastases and bone metastases                                                                     | Higher pTalin S425 levels in bone metastases compared to primary tumor and lymph node metastases (Talin phosphorylation is associated with AKT phosphorylation)                                                                                      |
|                 | Mainetti et al. 2015 [124]  | RT-PCR analysis of bone metastases and surrounding stroma                                                                                    | Expression of c-kit is enhanced in bone metastases (c-kit activates the PI3K/AKT pathway)                                                                                                                                                            |
| lung cancer     | Doloff et al. 2007 [125]    | Prostate cancer cells were cultured with bone marrow from a healthy male                                                                     | Bone-metastatic prostate cancer cells exhibit higher pAKT levels after stimulation with human bone marrow via $\alpha$ -PDGFR activation                                                                                                             |
|                 | Seol et al. 2019 [129]      | Expression data of The Cancer Genome Atlas                                                                                                   | Expression of IL-7 and IL-7R $\alpha$ (and therefore AKT activation) is associated with cancer stem cells and EMT                                                                                                                                    |
|                 | Tang et al. 2018 [131]      | Expression data of The Cancer Genome Atlas and analysis of bone metastasis-free survival of patients with low or high miR-133a-3p expression | miR-133a-3p levels are lower in patients with bone metastases compared to patients without bone metastases<br>Low levels of miR-133a-3p are associated with a lower bone metastasis-free survival (miR-133a-3p expression suppresses AKT activation) |
|                 | Liu et al. 2020 [152]       | Gene chip and quantitative PCR analysis of miR-365 serum levels in patients with bone metastases                                             | Serum miR-365 levels are reduced in patients with bone metastases (Downregulation of mir-365 promotes the EGFR/PI3K/AKT through NKX2-1)                                                                                                              |
|                 | Choi et al. 2020 [154]      | Next generation sequencing, Sanger sequencing and quantitative real-time PCR analysis of bone metastases                                     | RANKL expression is higher in bone metastases with a GNAQ mutant compared to bone metastases with GNAQ wildtype                                                                                                                                      |
|                 | Chang et al. 2017 [159]     | Expression data of The Cancer Genome Atlas                                                                                                   | High levels of Snail and pAKT in patients with lung cancer are associated with a shorter survival time                                                                                                                                               |
